# Supplementary material for: Impaired Performance of Broiler Chickens Fed Diets Naturally Contaminated with Moderate Levels of Deoxynivalenol
Source: PubMed Central journal article supplement (PMC7926331; doi:10.3390/toxins13020170), 2021-02-22
Supplement: toxins-13-00170-s001.pdf [file toxins-13-00170-s001.pdf]

## Supplementary Materials: Impaired Performance of Broiler Chickens Fed Diets Naturally Contaminated with Moderate Levels of Deoxynivalenol

Regiane R. Santos and Ellen van Eerden

**Table S1.** Composition of the experimental diets.

| Ingredients (%)                   | Starter<br>D0-14 | Grower<br>(D14-28) | Finisher<br>(D28-35) |
|-----------------------------------|------------------|--------------------|----------------------|
| Wheat (with moderate or low DON)  | 55.00            | 55.00              | -                    |
| Wheat (with marginal DON)         | -                | -                  | 44.96                |
| Soybean meal                      | 24.97            | 19.98              | 18.24                |
| Rye                               | 5.00             | 7.50               | -                    |
| Oats                              | -                | -                  | 3.98                 |
| Peas                              | -                | -                  | 3.25                 |
| Rapeseed meal                     | 1.00             | 2.50               | -                    |
| Corn                              | 1.06             | 3.31               | 11.00                |
| Corn gluten meal                  | -                | -                  | 6.00                 |
| Sunflower seed meal               | 3.76             | 2.64               | 3.98                 |
| Soya oil                          | 1.02             | 0                  | 0.75                 |
| Poultry fat                       | 3.98             | 5.55               | 3.00                 |
| Palmkernel fatty acids            | -                | -                  | 1.50                 |
| Salt                              | 0.11             | 0.12               | 0.08                 |
| Limestone                         | 1.16             | 1.04               | 0.72                 |
| Monocalcium Phosphate             | 1.22             | 0.74               | 0.19                 |
| Sodium Bicarbonate                | 0.35             | 0.30               | 0.33                 |
| Lysine HCl                        | 0.39             | 0.37               | 0.31                 |
| DL-Methionine                     | 0.30             | 0.25               | 0.21                 |
| Threonine                         | 0.13             | 0.12               | 0.11                 |
| Valine                            | 0.04             | 0.04               | 0.35                 |
| Arginine                          | 0.02             | 0.06               | -                    |
| Vitamin & Mineral premix          | 0.50             | 0.50               | 0.40                 |
| Phytase 1000 FTU                  | -                | -                  | 0.30                 |
| Ammomin                           | -                | -                  | 0.48                 |
| Choline-chloride                  | -                | -                  | 0.02                 |
| <b>Total</b>                      | <b>100.00</b>    | <b>100.00</b>      | <b>100.00</b>        |
| <b>Nutrients</b>                  |                  |                    |                      |
| Energy. kcal/kg                   | 2,875            | 2,950              | 3,090                |
| DM. g/kg                          | 883              | 882                | 887                  |
| Ash. g/kg                         | 55               | 47                 | 44                   |
| Crude protein. g/kg               | 215              | 196                | 183                  |
| Crude fat (acid hydrolysis). g/kg | 72               | 77                 | 71                   |
| Crude fibre. g/kg                 | 28               | 28                 | 34                   |
| Ca. g/kg                          | 7.6              | 6.3                | 4.9                  |
| P. g/kg                           | 6.6              | 5.3                | 4.2                  |
| K. g/kg                           | 8.9              | 8.0                | 7.7                  |
| Na. g/kg                          | 1.5              | 1.4                | 1.3                  |
| Cl. g/kg                          | 2.0              | 2.0                | 1.8                  |
